# Supplementary material
Source: MDPI journal article supplement (https://www.mdpi.com/2073-4344/8/3/121)

# Supplementary Materials: Single-Atom Mn Active Site in Triol-Stabilized $\beta$ -Anderson Manganohexamolybdate for Enhanced Catalytic Activity towards Adipic Acid Production

Jianhui Luo <sup>1,2,\*</sup>, Yichao Huang <sup>3,\*</sup>, Bin Ding <sup>1,2</sup>, Pingmei Wang <sup>1,2</sup>, Xiangfei Geng <sup>1,2</sup>, Jiangwei Zhang <sup>3,\*</sup> and Yongge Wei <sup>3,\*</sup>

<sup>1</sup> Research Institute of Petroleum Exploration & Development (RIPED), Petro China, Beijing 100083, China; luojh@petrochina.com.cn (J.L.); dingb@petrochina.com.cn (B.D.); wangpm@petrochina.com.cn (P.W.); gengxf@petrochina.com.cn (X.G.)

<sup>2</sup> Key Laboratory of Nano Chemistry (KLNC), CNPC, Beijing 100083, China

<sup>3</sup> Key Lab of Organic Optoelectronics & Molecular Engineering of Ministry of Education, Department of Chemistry, Tsinghua University, Beijing 100084, China; yichaoh@126.com

\* Correspondence: jwzhang@dicp.ac.cn (J.Z.); yonggewei@mail.tsinghua.edu.cn (Y.W.); Tel.: +86-010-627-97852

+ Y.H. and J.L. contributed equally to this work.

**Table S1.** Crystallographic data for compound **1**.

| Identification code                  | <b>1</b>                                                                        |
|--------------------------------------|---------------------------------------------------------------------------------|
| Empirical formula                    | C <sub>8</sub> H <sub>22</sub> N <sub>3</sub> MnMo <sub>6</sub> O <sub>24</sub> |
| Formula weight                       | 1174.87                                                                         |
| Temperature (K)                      | 293 (2)                                                                         |
| Crystal system                       | monoclinic                                                                      |
| Space group                          | C2/c                                                                            |
| a (Å)                                | 27.164(3)                                                                       |
| b (Å)                                | 18.061(2)                                                                       |
| c (Å)                                | 16.099(2)                                                                       |
| $\alpha$ (°)                         | 90.00                                                                           |
| $\beta$ (°)                          | 110.120(14)                                                                     |
| $\gamma$ (°)                         | 90.00                                                                           |
| Volume (Å <sup>3</sup> )             | 7416.4(15)                                                                      |
| Z                                    | 8                                                                               |
| Density (g.cm <sup>-3</sup> )        | 2.097                                                                           |
| $\mu$ (mm <sup>-1</sup> )            | 2.369                                                                           |
| Crystal size (mm <sup>3</sup> )      | 0.55×0.50×0.40                                                                  |
| Reflections collected                | 7199                                                                            |
| Independent reflections              | 5784                                                                            |
| F (000)                              | 4448.0                                                                          |
| GOF                                  | 1.084                                                                           |
| Final R indices [I > 2 $\sigma$ (I)] | R <sub>1</sub> =0.0535, wR <sub>2</sub> =0.0974                                 |
| R indices (all data)                 | R <sub>1</sub> =0.0596, wR <sub>2</sub> =0.1012                                 |

$$^a R_1 = \sum ||F_o| - |F_c|| / \sum |F_o|$$

$$^b wR_2 = \{\sum [w(F_o^2 - F_c^2)^2] / \sum w(F_o^2)\}^{1/2}$$

**Table S2.** Selected bond lengths (Å) of cluster 1.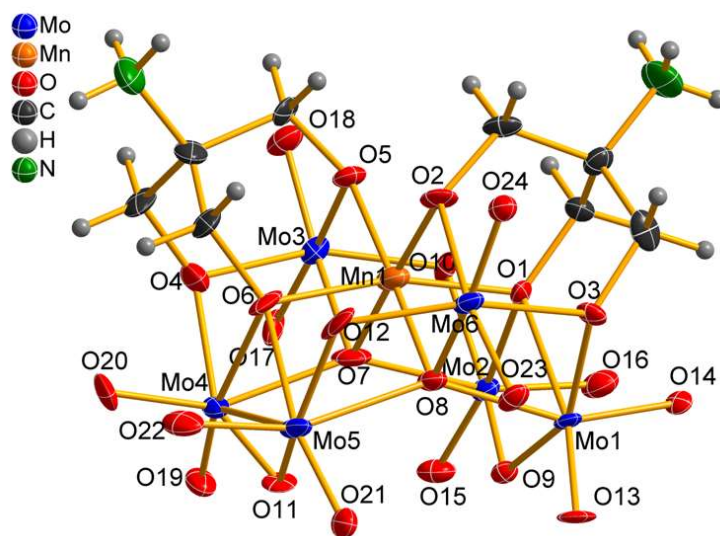

| Selected bond lengths (Å) of cluster 1 |       |         |       |
|----------------------------------------|-------|---------|-------|
| Mn1-O1                                 | 1.986 | Mo3-O10 | 1.904 |
| Mn1-O2                                 | 1.942 | Mo3-O17 | 1.698 |
| Mn1-O5                                 | 1.936 | Mo3-O18 | 1.728 |
| Mn1-O6                                 | 1.983 | Mo4-O4  | 2.098 |
| Mn1-O7                                 | 1.969 | Mo4-O6  | 2.280 |
| Mn1-O8                                 | 1.961 | Mo4-O7  | 2.160 |
| Mo1-O1                                 | 2.276 | Mo4-O11 | 1.882 |
| Mo1-O3                                 | 2.054 | Mo4-O19 | 1.693 |
| Mo1-O8                                 | 2.156 | Mo4-O20 | 1.722 |
| Mo1-O9                                 | 1.877 | Mo5-O6  | 2.315 |
| Mo1-O13                                | 1.735 | Mo5-O8  | 2.262 |
| Mo1-O14                                | 1.719 | Mo5-O11 | 1.914 |
| Mo2-O1                                 | 2.319 | Mo5-O12 | 1.944 |
| Mo2-O7                                 | 2.221 | Mo5-O21 | 1.691 |
| Mo2-O9                                 | 1.933 | Mo5-O22 | 1.701 |
| Mo2-O10                                | 1.979 | Mo6-O2  | 2.189 |
| Mo2-O15                                | 1.677 | Mo6-O3  | 2.145 |
| Mo2-O16                                | 1.730 | Mo6-O8  | 2.169 |
| Mo3-O4                                 | 2.107 | Mo6-O12 | 1.899 |
| Mo3-O5                                 | 2.180 | Mo6-O23 | 1.712 |
| Mo3-O7                                 | 2.178 | Mo6-O24 | 1.732 |

**Table S3.** Experimental hydrogen bonding interactions of compound **1**.

| Bond     | H-Bonds      | D–A [Å] | A···H [Å] | D–H···A [°] |
|----------|--------------|---------|-----------|-------------|
| <b>1</b> | N3–H3C···O14 | 2.897   | 2.247     | 138.52      |
|          | N3–H3D···O11 | 2.900   | 2.206     | 145.00      |
|          | N3–H3E···O15 | 2.992   | 2.211     | 168.11      |
|          | N3–H3F···O19 | 2.719   | 2.468     | 99.54       |
|          | N2–H2C···O16 | 3.483   | 2.959     | 119.46      |
|          | N2–H2C···O24 | 3.453   | 2.793     | 132.19      |

The color of this Anderson  $\beta$  isomer triol functionalized derivative single crystal is different compared with Anderson  $\alpha$  isomer triol functionalized derivative, because the color of the Anderson  $\alpha$  isomer triol functionalized derivative was nearly the same as the normal  $\alpha$  parent Anderson. The color of  $[\text{Mn}(\text{OH})_6\text{Mo}_6\text{O}_{18}]^{3-}$  anion is orange while Anderson  $\beta$  isomer derivative (compound **1**) is dark orange. UV-Vis was applied for LMCT absorption and d-d transition absorption investigation. It should be noted that the UV-Vis spectra of such Anderson  $\beta$  isomer triol functionalized derivatives actually should be compared with the parent Anderson  $\beta$  isomer cluster, however such conjectured reaction intermediate has not yet been successfully obtained. As a compromise, we first compared them with the LMCT absorption band of the parent “Anderson–Evans”,  $[\text{Mn}(\text{OH})_6\text{Mo}_6\text{O}_{18}]^{3-}$ , locating around 230 nm which primarily corresponds to ligand centered  $\mu_3\text{-OH } \pi$  to metal-centered  $\text{Mo}^{6+} t_{2g}^*$  charge transfer transition (LMCT), these LMCT bands of compound **1** show hypsochromic shift to 212 ( $\epsilon_{\text{LMCT}} = 5.31 \times 10^5 \text{ L}\cdot\text{mol}^{-1}\cdot\text{cm}^{-1}$ ,  $7.42 \times 10^5 \text{ L}\cdot\text{mol}^{-1}\cdot\text{cm}^{-1}$  for parent Anderson cluster, compound **1**, respectively) It is due to the increase of crystal field splitting energy since the  $\mu\text{-OCH}_2$  is stronger field ligand than that  $\mu_3\text{-OH}$ . The d-d transition absorption band of the parent  $[\text{Mn}(\text{OH})_6\text{Mo}_6\text{O}_{18}]^{3-}$  locating around 478 nm is assigned to the metal centered lowest energy electronic transition from HOMO  $t_{2g}^*$  to LUMO  $e_g^*$  transition of  $\text{Mn}^{3+}$ . Similar hypsochromic shift phenomenon is observed in compound **1** at 461 nm, respectively ( $\epsilon_{d-d} = 6.14 \times 10^2 \text{ L}\cdot\text{mol}^{-1}\cdot\text{cm}^{-1}$ ,  $8.53 \times 10^2 \text{ L}\cdot\text{mol}^{-1}\cdot\text{cm}^{-1}$  for parent Anderson cluster, compound **1**, respectively). The hypsochromic shift is assigned to the reduction of charge density in  $\mu\text{-O}$  when triol ligands anchored on. It is worthy to point out that in our previous work, similar range of hypsochromic shift was also observed in Anderson  $\alpha$  isomer triol functionalized derivative, however, the  $\epsilon_{\text{LMCT}}$  and  $\epsilon_{d-d}$  is quite smaller. In fact, the  $\epsilon_{\text{LMCT}}$  and  $\epsilon_{d-d}$  of Anderson  $\alpha$  isomer triol functionalized derivative is not much different from the parent Anderson  $\alpha$  isomer  $[\text{Mn}(\text{OH})_6\text{Mo}_6\text{O}_{18}]^{3-}$  anion. Thus, the color of the Anderson  $\alpha$  isomer triol functionalized derivative and the corresponding parent cluster was nearly the same. Perhaps it is the total change of  $\mu\text{-O}$  coordination environment in Anderson  $\beta$  isomer triol functionalized derivative skeleton that leads to the remarkable increase of  $\epsilon_{\text{LMCT}}$  and  $\epsilon_{d-d}$  and the related obvious color change.

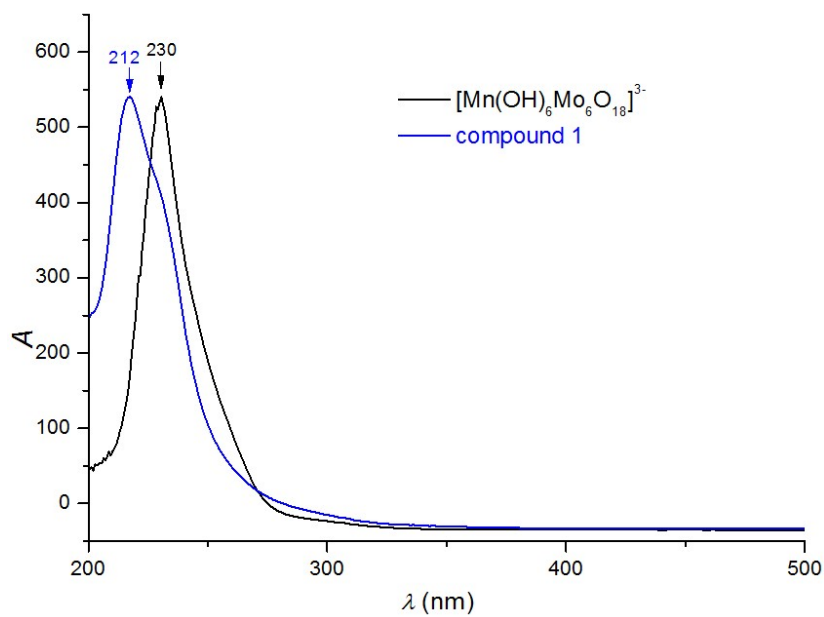

(a)

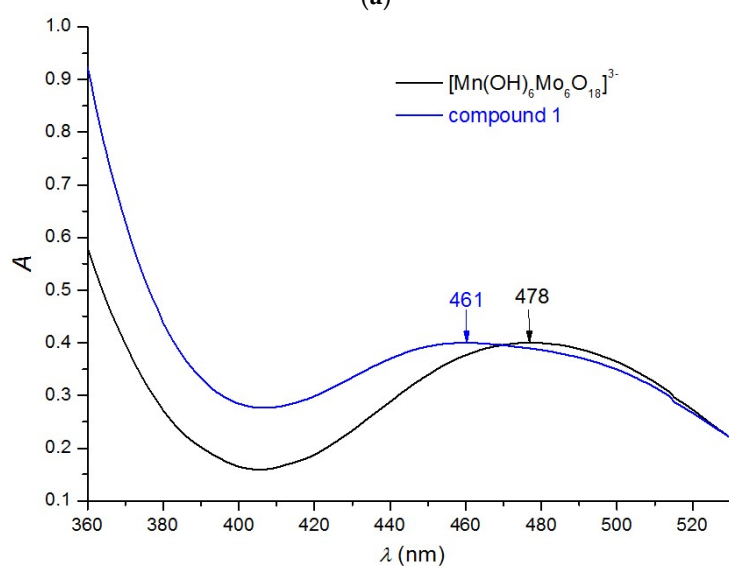

(b)

**Figure S1.** (a) UV/Vis LMCT spectra of compound 1 and the flat Anderson-type POMs Cluster,  $[\text{MnMo}_6\text{O}_{18}(\text{OH})_6]^{3-}$ . (b) UV/Vis d-d transition spectra of compound 1 and the flat Anderson-type POMs Cluster,  $[\text{MnMo}_6\text{O}_{18}(\text{OH})_6]^{3-}$ .

Considering one of the obvious structure features in triol functionalized Anderson  $\beta$  isomer derivative is that there exist one type of  $\mu_3$ -O and two types of  $\mu_2$ -O, where triol ligand is anchored on their surface. Hence, there should be three different types of ( $\mu$ -O-) C atoms where each carbon atom has different chemical shifts based on different electronegative environment according to dissimilar charge density of these  $\mu$ -O atoms. In fact, the electronegative sequence of these  $\mu$ -O atoms from stronger to weaker is as follows:  $\mu_2$ -O (coordinated one molybdenum atom and the central hetero atom) >  $\mu_2$ -O (coordinated with two molybdenum atoms) >  $\mu_3$ -O (coordinated with two molybdenum atoms and the central hetero atom). The  $^{13}\text{C}$  NMR spectrum is another effective choice to verify such structure from another aspect. Thus, the  $^{13}\text{C}$  NMR spectrum of compound **1** was conducted and all the peaks were clearly assigned to confirm the structure (Figure S2).

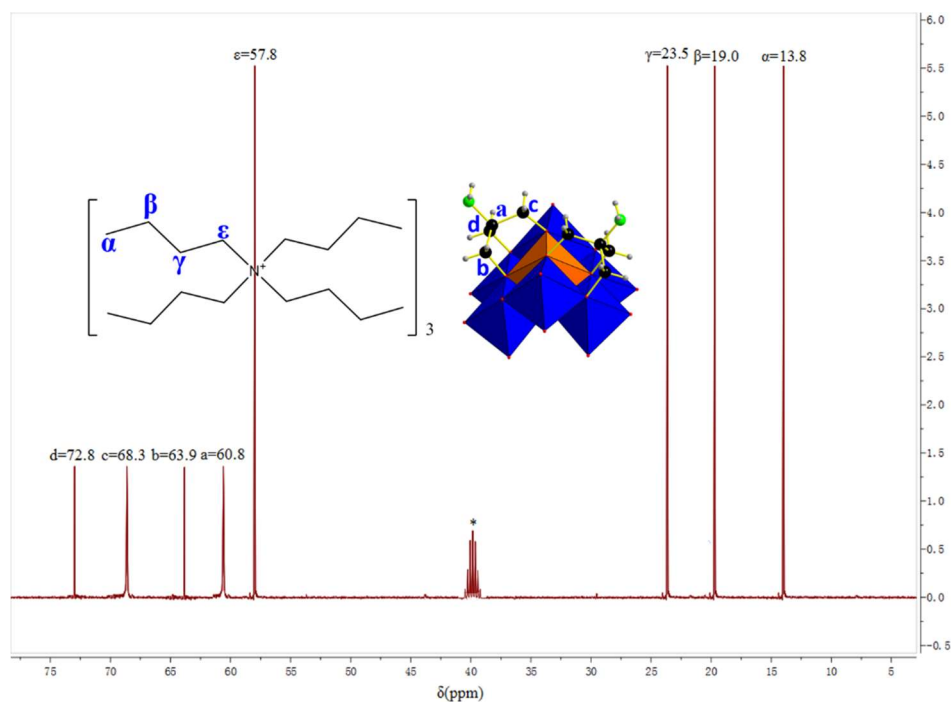

**Figure S2.**  $^{13}\text{C}$  NMR spectrum of compound **1**.

The ESI-MS spectra of compound 1 was conducted and all the peaks the main peak with highest intensity and other identifiable peaks were clearly assigned to confirm the structure.

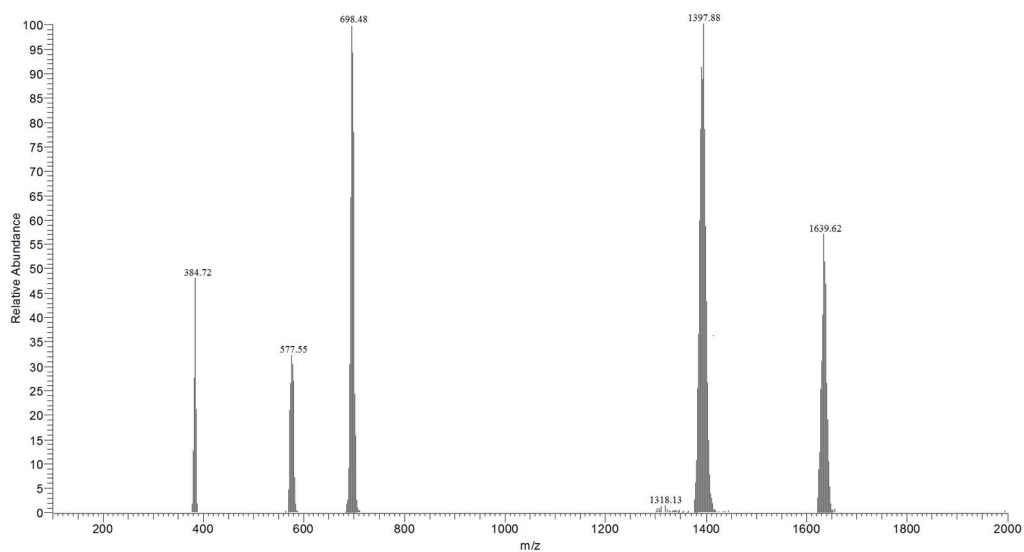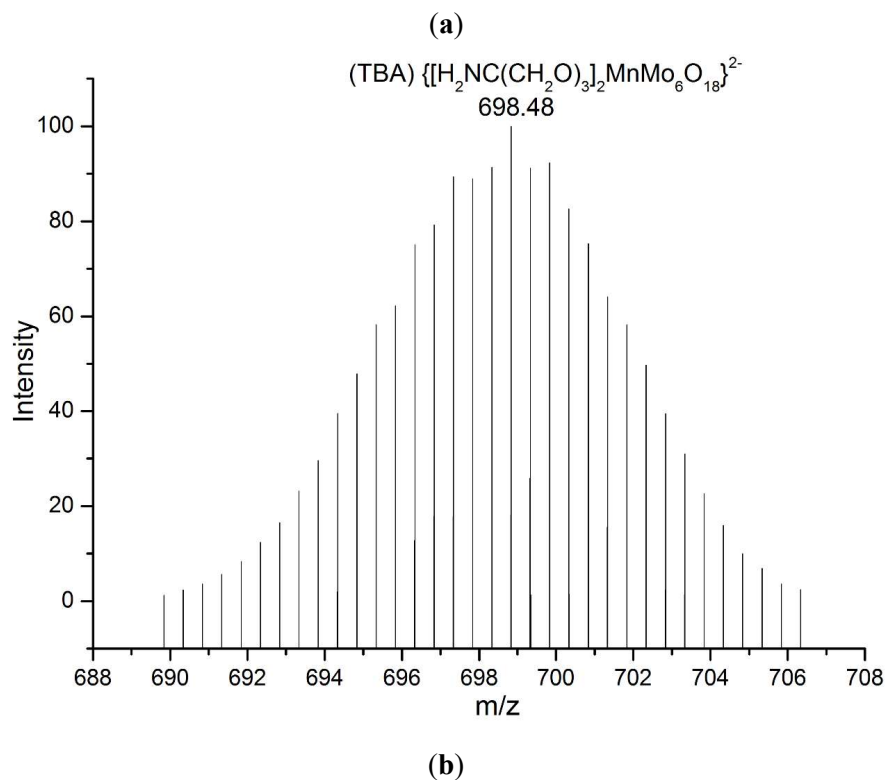

**Figure S3.** (a) ESI-MS of compound 1 with TBA<sup>+</sup> cations. (b) ESI-MS of compound 1 with TBA<sup>+</sup> cations (100% intensity peak in original size).

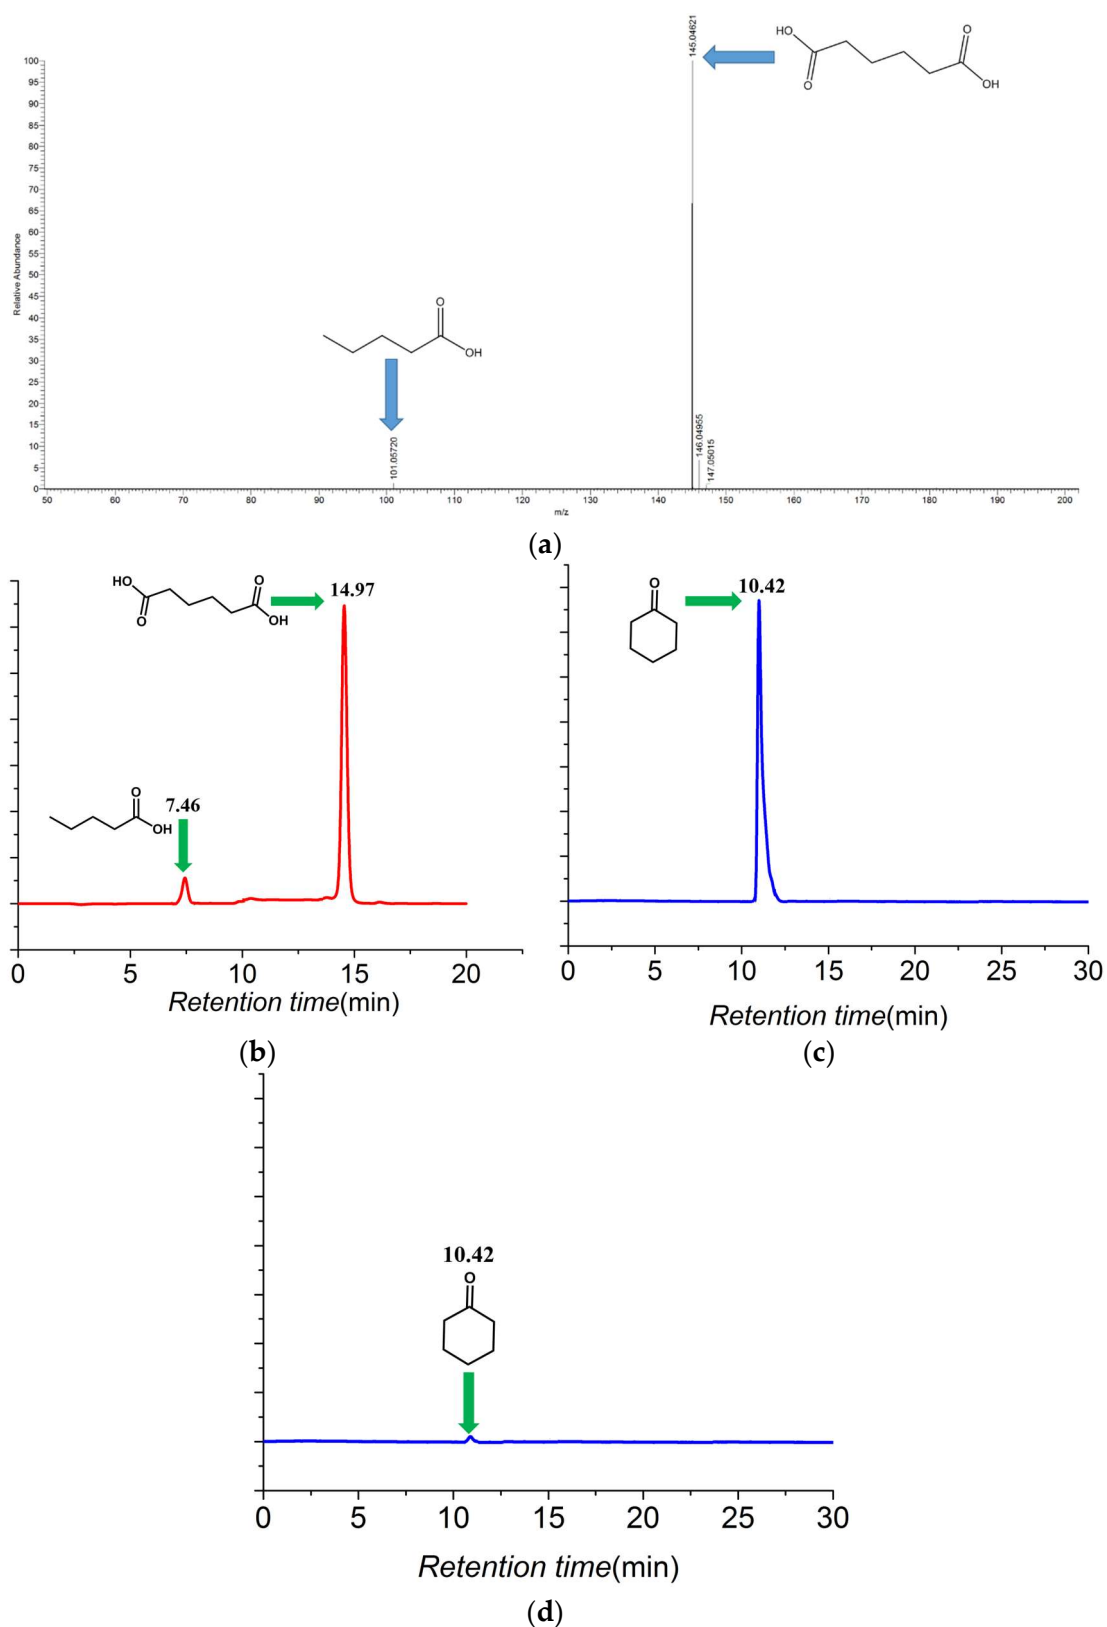

**Figure S4.** (a) The ESI-MS of white crystalline products generated from cyclohexanone in the presence of catalyst 1. (b) The HPLC retention time of white crystalline products dissolved in methanol. (c) The GC-MS of reaction solution dissolved in ethanol before catalytic reaction. (d) The GC-MS of reaction solution dissolved in ethanol after catalytic reaction.

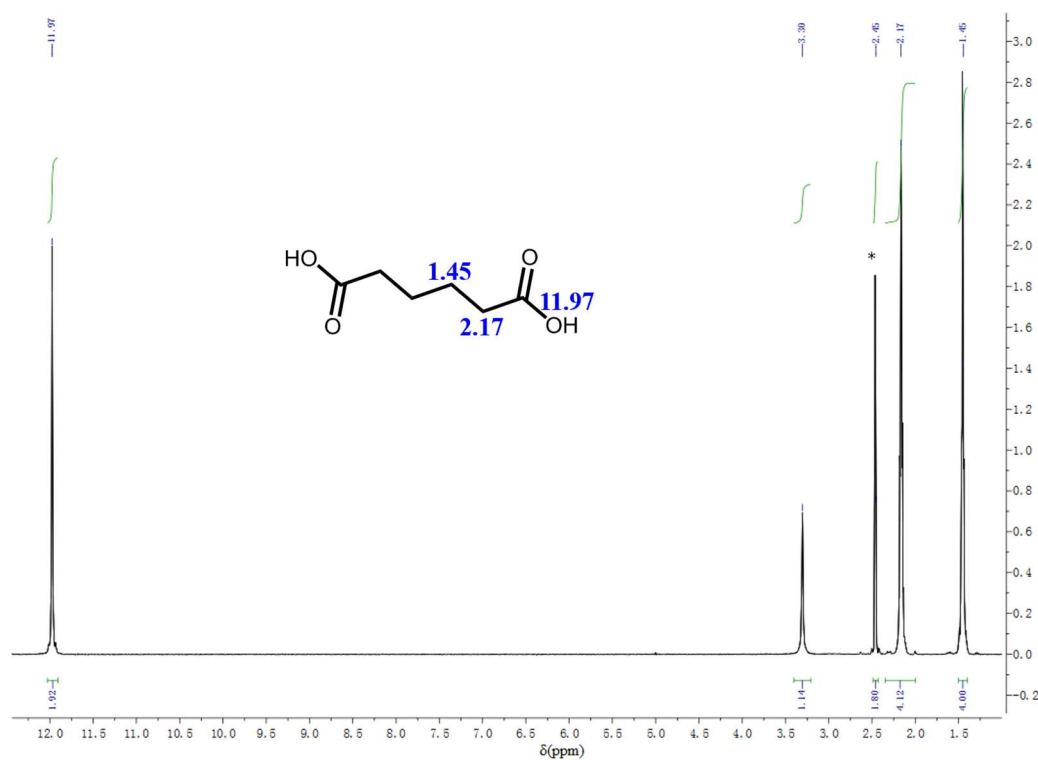

(a)

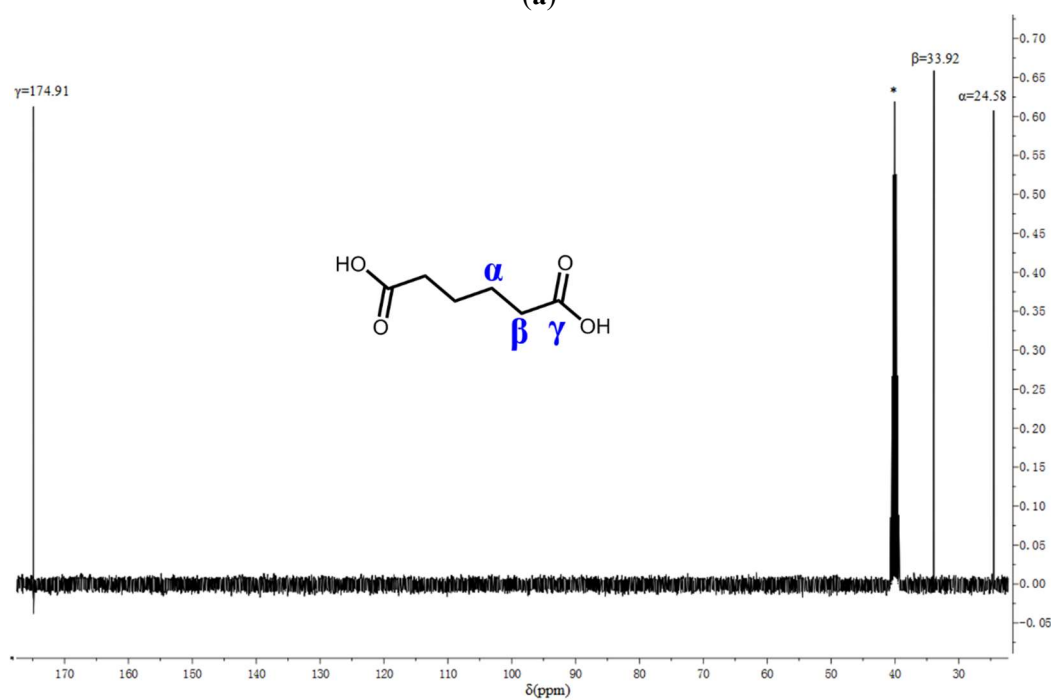

(b)

**Figure S5.** (a) <sup>1</sup>H NMR spectrum of white crystalline product. (b) <sup>13</sup>C NMR spectrum of white crystalline product.



## Topology analysis of Catalysis Species

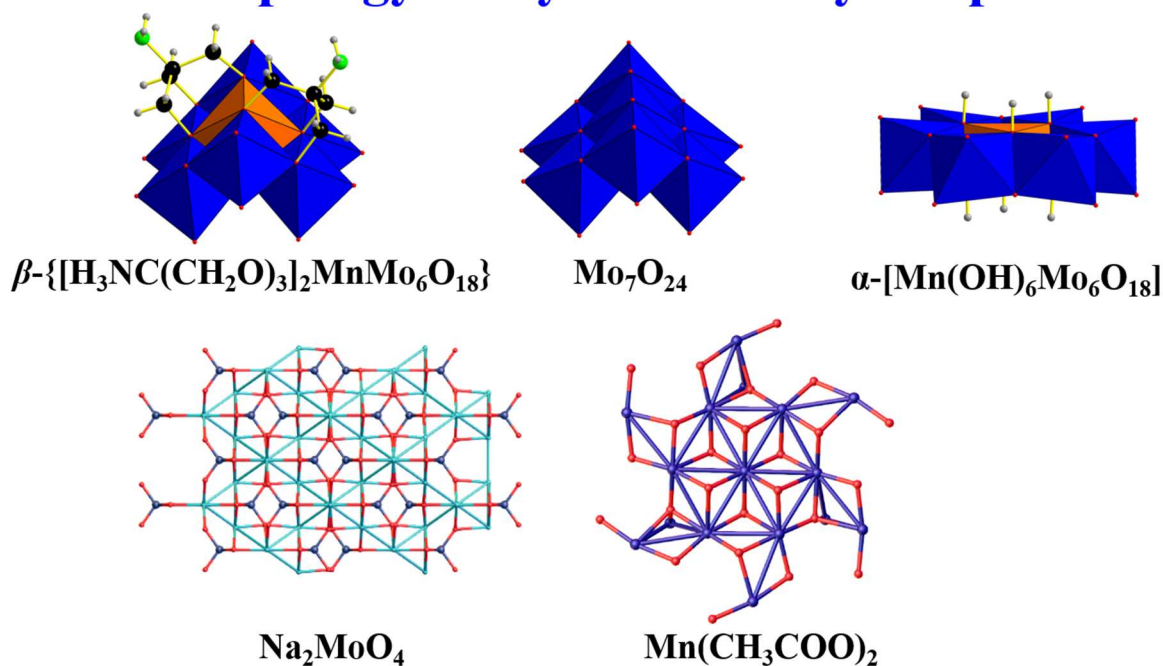

Figure S6. Topology analysis and comparison of Catalysis Species.

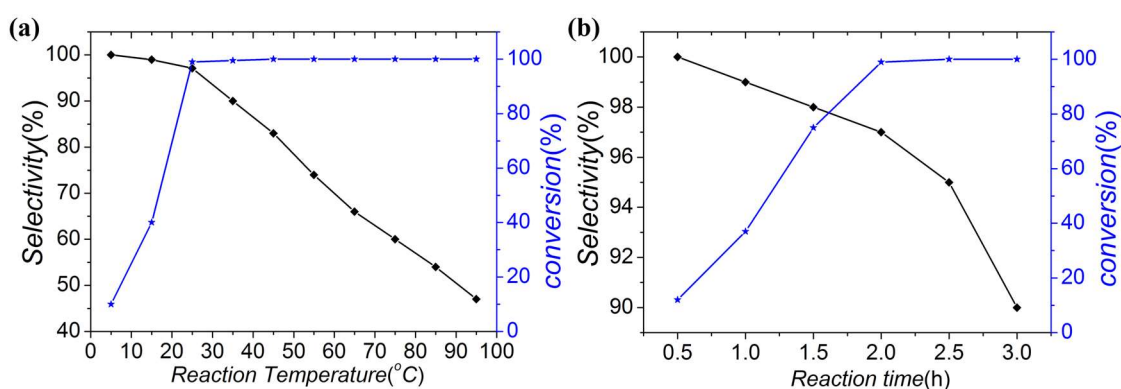

Figure S7. (a) The reaction selectivity and conversion versus reaction temperature, reaction condition catalyst (0.02 mol %), 30%  $H_2O_2$  (100 mmol), DMSO (1 mmol), and cyclohexanone (30 mmol) at 2h. (b) The reaction selectivity and conversion versus time, reaction condition catalyst (0.02 mol %), 30%  $H_2O_2$  (100 mmol), DMSO (1 mmol), and cyclohexanone (30 mmol) at 25°C in cyclohexanone oxidation catalytic reaction.

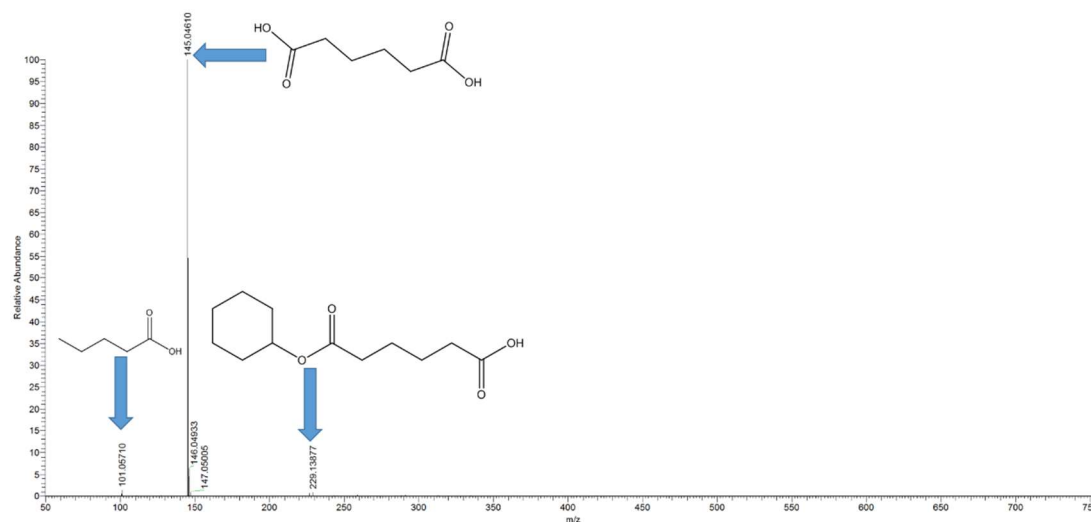

**Figure S8.** The ESI-MS of products from the catalytic oxidation of cyclohexanol at room temperature.

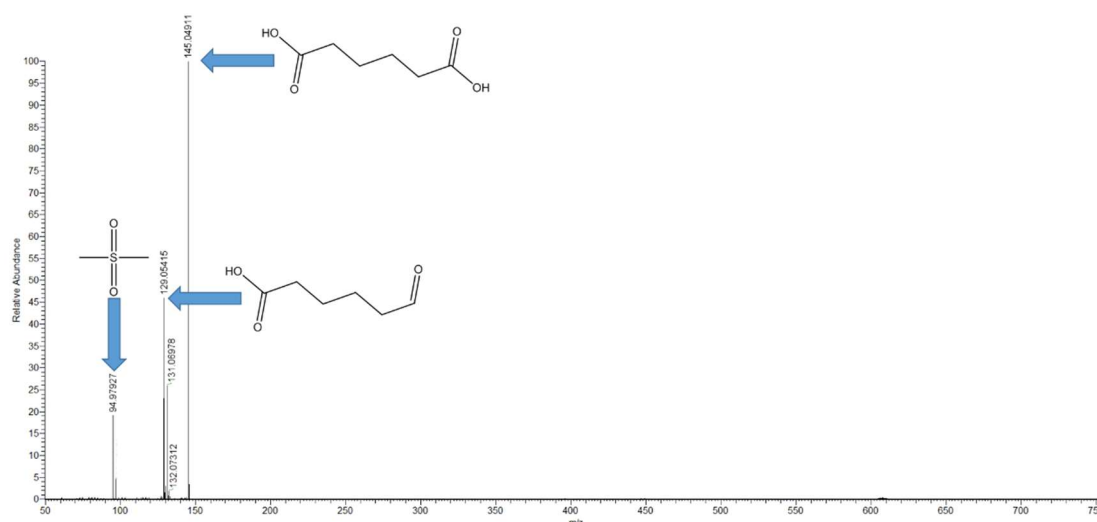

**Figure S9.** The ESI-MS of white crystalline products generated from cyclohexanol with DMSO.

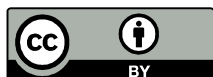

Supplement: s1 [file s1]
